# Supplementary material for: Isolation, identification, and stability of Ficin 1c isoform from fig latex
Source: Royal Society of Chemistry journal article supplement (doi:10.1039/d0nj02938f), 2020-01-01

## Isolation, identification, and stability of Ficin 1c isoform from fig latex

Jelica Milošević<sup>a</sup>, Lidija Vrhovac<sup>a,b</sup>, Filip Đurković<sup>a</sup>, Brankica Janković<sup>a,c</sup>, Saša Malkov<sup>d</sup>,  
Jurij Lah<sup>e</sup> and Natalija Đ. Polović<sup>\*a</sup>

<sup>a</sup> Department of Biochemistry, University of Belgrade - Faculty of Chemistry, Serbia

<sup>b</sup> Present address: Department of Chemistry and Molecular Biology, University of Gothenburg, Sweden

<sup>c</sup> Present address: Department of Chemistry, University of Zurich, Switzerland

<sup>d</sup> University of Belgrade - Faculty of Mathematics, Serbia

<sup>e</sup> University of Ljubljana, Faculty of Chemistry and Chemical Technology, Slovenia

**New Journal of Chemistry**

Supplementary Table S1. Ficin isoforms characteristics based on Uniprot data.

| <b>Transcriptome-derived protein sequence</b>   | <b>#N amino acids</b> | <b>pI</b> | <b>Mw (Da)</b> |
|-------------------------------------------------|-----------------------|-----------|----------------|
| <b>Ficin 1a (A0A2Z6DRL4)</b>                    | 217                   | 6.89      | 23642.55       |
| <b>Ficin 1b (A0A2Z6DRT1)</b>                    | 217                   | 8.42      | 23571.56       |
| <b>Ficin 1c (A0A2Z6DRL5)</b>                    | 216                   | 8.64      | 23586.62       |
| <b>Ficin 2a (A0A2Z6DRL9)</b>                    | 216                   | 5.39      | 23276.18       |
| <b>Ficin 2b (A0A2Z6DRP9)</b>                    | 216                   | 5.39      | 23248.17       |
| <b>Ficin 2c (A0A2Z6DRM5)</b>                    | 216                   | 5.39      | 23248.17       |
| <b>Ficin 3 (A0A2Z6DRN1)</b>                     | 217                   | 9.50      | 23703.88       |
| <b>Ficin 4 (A0A2Z6DRL6)</b>                     | 215                   | 8.88      | 23287.30       |
| <b>Ficin 5 (A0A2Z6DRM9)</b>                     | 217                   | 8.85      | 23810.96       |
| <b>Ficin 6a (A0A2Z6DRW8)</b>                    | 217                   | 7.70      | 24053.24       |
| <b>Ficin 6b (A0A2Z6DRN0)</b>                    | 217                   | 7.70      | 24053.24       |
| <b>Protein sequence with known 3D structure</b> | <b>#N amino acids</b> | <b>pI</b> | <b>Mw (Da)</b> |
| <b>Ficin isoform A (A0A182DW06)</b>             | 217                   | 8.94      | 23532.64       |
| <b>Ficin isoform B (A0A182DW08)</b>             | 217                   | 7.69      | 24114.15       |
| <b>Ficin C (A0A182DW09)</b>                     | 217                   | 8.10      | 24173.32       |
| <b>Ficin D (A0A182DW11)</b>                     | 217                   | 4.87      | 23657.57       |

Supplementary Table S2. Peptide-mass fingerprint of the isolated ficin isoform.

**1. Name:** Ficin1c **MW:**  
23587 Da **pI:** 8.6

| m/z<br>Submitted | MH <sup>+</sup><br>Matched | Intensity | Delta<br>Da | Start | End | Missed<br>Cleavages | Sequence                         |
|------------------|----------------------------|-----------|-------------|-------|-----|---------------------|----------------------------------|
| 679.1800         | 679.3232                   | 100.0     | -0.143      | 67    | 72  | 0                   | (R) <u>GGWMTK</u> (A)            |
| 750.0800         | 750.3451                   | 100.0     | -0.265      | 96    | 102 | 0                   | (K) <u>GECNVTK</u> (A)           |
| 750.0800         | 750.3781                   | 100.0     | -0.298      | 113   | 118 | 0                   | (R) <u>YESVPR</u> (N)            |
| 785.3100         | 785.4152                   | 100.0     | -0.105      | 198   | 205 | 0                   | (R) <u>NVAEPAGK</u> (C)          |
| 878.8000         | 878.4400                   | 100.0     | 0.360       | 95    | 102 | 1                   | (R) <u>KGECNVTK</u> (A)          |
| 885.2000         | 885.4716                   | 100.0     | -0.272      | 73    | 79  | 0                   | (K) <u>AYDYIHK</u> (N)           |
| 1015.3100        | 1015.5207                  | 100.0     | -0.211      | 1     | 8   | 0                   | (-) <u>LPETVDWR</u> (I)          |
| 1061.4300        | 1061.5586                  | 100.0     | -0.129      | 103   | 112 | 0                   | (K) <u>ASQTVATIDR</u> (Y)        |
| 1105.6600        | 1105.4810                  | 100.0     | 0.179       | 182   | 190 | 0                   | (R) <u>NSWGNWGER</u> (G)         |
| 1178.3000        | 1178.5333                  | 100.0     | -0.233      | 206   | 216 | 0                   | (K) <u>CGIAMHSTYPV</u> (-)       |
| 1568.7200        | 1568.8391                  | 100.0     | -0.119      | 127   | 142 | 0                   | (K) <u>AVANQPVSVTIEAGGR</u> (A)  |
| 1628.7500        | 1628.7663                  | 100.0     | -0.0163     | 80    | 94  | 0                   | (K) <u>NGGITSQSNYPYTAR</u> (K)   |
| 1696.5900        | 1696.9341                  | 100.0     | -0.344      | 126   | 142 | 1                   | (K) <u>KAVANQPVSVTIEAGGR</u> (A) |
| 1757.1600        | 1756.8613                  | 100.0     | 0.299       | 80    | 95  | 1                   | (K) <u>NGGITSQSNYPYTARK</u> (G)  |

The matched peptides cover **48.6%** (105/216AA's) of the protein.

**2. Name:** Ficin1a (**8% of sequence difference between Ficin 1a and Ficin 1c**)  
**MW:** 23643 Da **pI:** 6.9

| m/z<br>Submitted | MH <sup>+</sup><br>Matched | Intensity | Delta<br>Da | Start | End | Missed<br>Cleavages | Sequence                        |
|------------------|----------------------------|-----------|-------------|-------|-----|---------------------|---------------------------------|
| 885.2000         | 885.4716                   | 100.0     | -0.272      | 73    | 79  | 0                   | (K) <u>AYDYIHK</u> (N)          |
| 1015.3100        | 1015.5207                  | 100.0     | -0.211      | 1     | 8   | 0                   | (-) <u>LPETVDWR</u> (I)         |
| 1628.7500        | 1628.7663                  | 100.0     | -0.0163     | 80    | 94  | 0                   | (K) <u>NGGITSQSNYPYTAR</u> (K)  |
| 1757.1600        | 1756.8613                  | 100.0     | 0.299       | 80    | 95  | 1                   | (K) <u>NGGITSQSNYPYTARK</u> (G) |

The matched peptides cover **14.3%** (31/217AA's) of the protein.

**3. Name:** Ficin3 (**18% of sequence difference between Ficin 1a and Ficin 1c**) **MW:** 23704 Da **pI:** 9.5

| m/z<br>Submitted | MH <sup>+</sup><br>Matched | Intensity | Delta<br>Da | Start | End | Missed<br>Cleavages | Sequence                     |
|------------------|----------------------------|-----------|-------------|-------|-----|---------------------|------------------------------|
| 885.2000         | 885.4716                   | 100.0     | -0.272      | 73    | 79  | 0                   | (R) <u>AYDYIHK</u> (N)       |
| 1015.3100        | 1015.5207                  | 100.0     | -0.211      | 1     | 8   | 0                   | (-) <u>LPETVDWR</u> (S)      |
| 1061.4300        | 1061.5586                  | 100.0     | -0.129      | 103   | 112 | 0                   | (K) <u>ASQTVATIDR</u> (Y)    |
| 1586.5400        | 1586.7784                  | 100.0     | -0.238      | 67    | 79  | 1                   | (K) <u>GGWMNRAYDYIHK</u> (N) |

The matched peptides cover **14.3%** (31/217AA's) of the protein.

**1. Name: FicinC (12% of sequence difference between Ficin C and Ficin 1c) MW: 24174 Da pI: 8.1**

| m/z Submitted | MH+ Matched | Intensity | Delta Da | Start | End | Missed Cleavages | Sequence                         |
|---------------|-------------|-----------|----------|-------|-----|------------------|----------------------------------|
| 885.2000      | 885.4716    | 100.0     | -0.272   | 73    | 79  | 0                | (K) <u>AYDYIIK</u> (N)           |
| 1015.3100     | 1015.5207   | 100.0     | -0.211   | 1     | 8   | 0                | (-)LPETVDWR(I)                   |
| 1297.5400     | 1297.6279   | 100.0     | -0.0879  | 207   | 218 | 0                | (K) <u>CGIAMQSTYPVK</u> (K)      |
| 1425.9400     | 1425.7229   | 100.0     | 0.217    | 207   | 219 | 1                | (K) <u>CGIAMQSTYPVKK</u> (T)     |
| 1568.7200     | 1568.8391   | 100.0     | -0.119   | 127   | 142 | 0                | (K) <u>AVANQPVSVTIEAGGR</u> (A)  |
| 1696.5900     | 1696.9341   | 100.0     | -0.344   | 126   | 142 | 1                | (K) <u>KAVANQPVSVTIEAGGR</u> (A) |

The matched peptides cover **20.3%** (45/222AA's) of the protein.

**2. Name: FicinD (30% of sequence difference between Ficin D and Ficin 1c) MW: 23658 Da pI: 4.9**

| m/z Submitted | MH+ Matched | Intensity | Delta Da | Start | End | Missed Cleavages | Sequence                        |
|---------------|-------------|-----------|----------|-------|-----|------------------|---------------------------------|
| 885.2000      | 885.4716    | 100.0     | -0.272   | 73    | 79  | 0                | (K) <u>AYDYIIK</u> (D)          |
| 1015.3100     | 1015.5207   | 100.0     | -0.211   | 1     | 8   | 0                | (-)LPETVDWR(S)                  |
| 1730.5200     | 1730.7980   | 100.0     | -0.278   | 80    | 94  | 1                | (K) <u>DRGITSESDYPY TAR</u> (K) |

The matched peptides cover **13.6%** (30/220AA's) of the protein.

**3. Name: FicinB (11% of sequence difference between Ficin B and Ficin 1c) MW: 24157 Da pI: 7.7**

| m/z Submitted | MH+ Matched | Intensity | Delta Da | Start | End | Missed Cleavages | Sequence                     |
|---------------|-------------|-----------|----------|-------|-----|------------------|------------------------------|
| 885.2000      | 885.4716    | 100.0     | -0.272   | 73    | 79  | 0                | (K) <u>AYDYIIK</u> (N)       |
| 1015.3100     | 1015.5207   | 100.0     | -0.211   | 1     | 8   | 0                | (-)LPETVDWR(I)               |
| 1297.5400     | 1297.6279   | 100.0     | -0.0879  | 207   | 218 | 0                | (K) <u>CGIAMQSTYPVK</u> (K)  |
| 1425.9400     | 1425.7229   | 100.0     | 0.217    | 207   | 219 | 1                | (K) <u>CGIAMQSTYPVKK</u> (T) |

The matched peptides cover **12.6%** (28/222AA's) of the protein.

Supplementary Table S3. Sequence coverage of Ficin 1c by templates and confidence values of the match to the template in the Phyre2 model.

| <b>Template<br/>PDB code</b> | <b>Protein name and function</b>                                                                               | <b>Alignment<br/>coverage (%)</b> | <b>Confidence<br/>(%)</b> | <b>Identity<br/>(%)</b> |
|------------------------------|----------------------------------------------------------------------------------------------------------------|-----------------------------------|---------------------------|-------------------------|
| 1PCI                         | Pro Caricain, Cystein protease from <i>Carica papaya</i>                                                       | 99                                | 100                       | 53                      |
| 5EGW                         | Amb a 11, Cystein protease allergen from <i>Ambrosia artemisiifolia</i> (2.70 Å)                               | 99                                | 100                       | 48                      |
| 5EF4                         | Amb a 11, Cystein protease allergen from <i>Ambrosia artemisiifolia</i> (2.05 Å)                               | 99                                | 100                       | 48                      |
| 6U7D                         | Recombinant stem bromelain precursor, cystein protease from <i>Ananas comosus</i>                              | 99                                | 100                       | 53                      |
| 1AEC                         | Actinidin-E-64 komplex, cystein protease from <i>Actinidia chinensis</i>                                       | 99                                | 100                       | 58                      |
| 4YYW                         | Ficin D2, hydrolase form <i>Ficus carica</i>                                                                   | 99                                | 100                       | 70                      |
| 7PCK                         | Wild type human Procathepsin K, lysosomal cysteine protease from <i>Homo sapiens</i>                           | 99                                | 100                       | 41                      |
| 3TNX                         | Thermostable variant of papain (2.60 Å), hydrolase from <i>Carica papaya</i>                                   | 99                                | 100                       | 50                      |
| 1S4V                         | KDEL-tailed cystein endopeptidase functioning in programmed cell death, from <i>Ricinus communis endosperm</i> | 99                                | 100                       | 54                      |
| 2C0Y                         | Cys25Ala mutant of human procathepsyn S, hydrolase from <i>Homo sapiens</i>                                    | 99                                | 100                       | 42                      |
| 1PPO                         | Papaya protease omega, cystein protease from <i>Carica papaya</i>                                              | 99                                | 100                       | 53                      |
| 4YYQ                         | Ficin A, hydrolase from <i>Ficus carica</i>                                                                    | 99                                | 100                       | 73                      |

Supplementary Figure S1. Sequence alignment of mature forms of ficin isoforms.

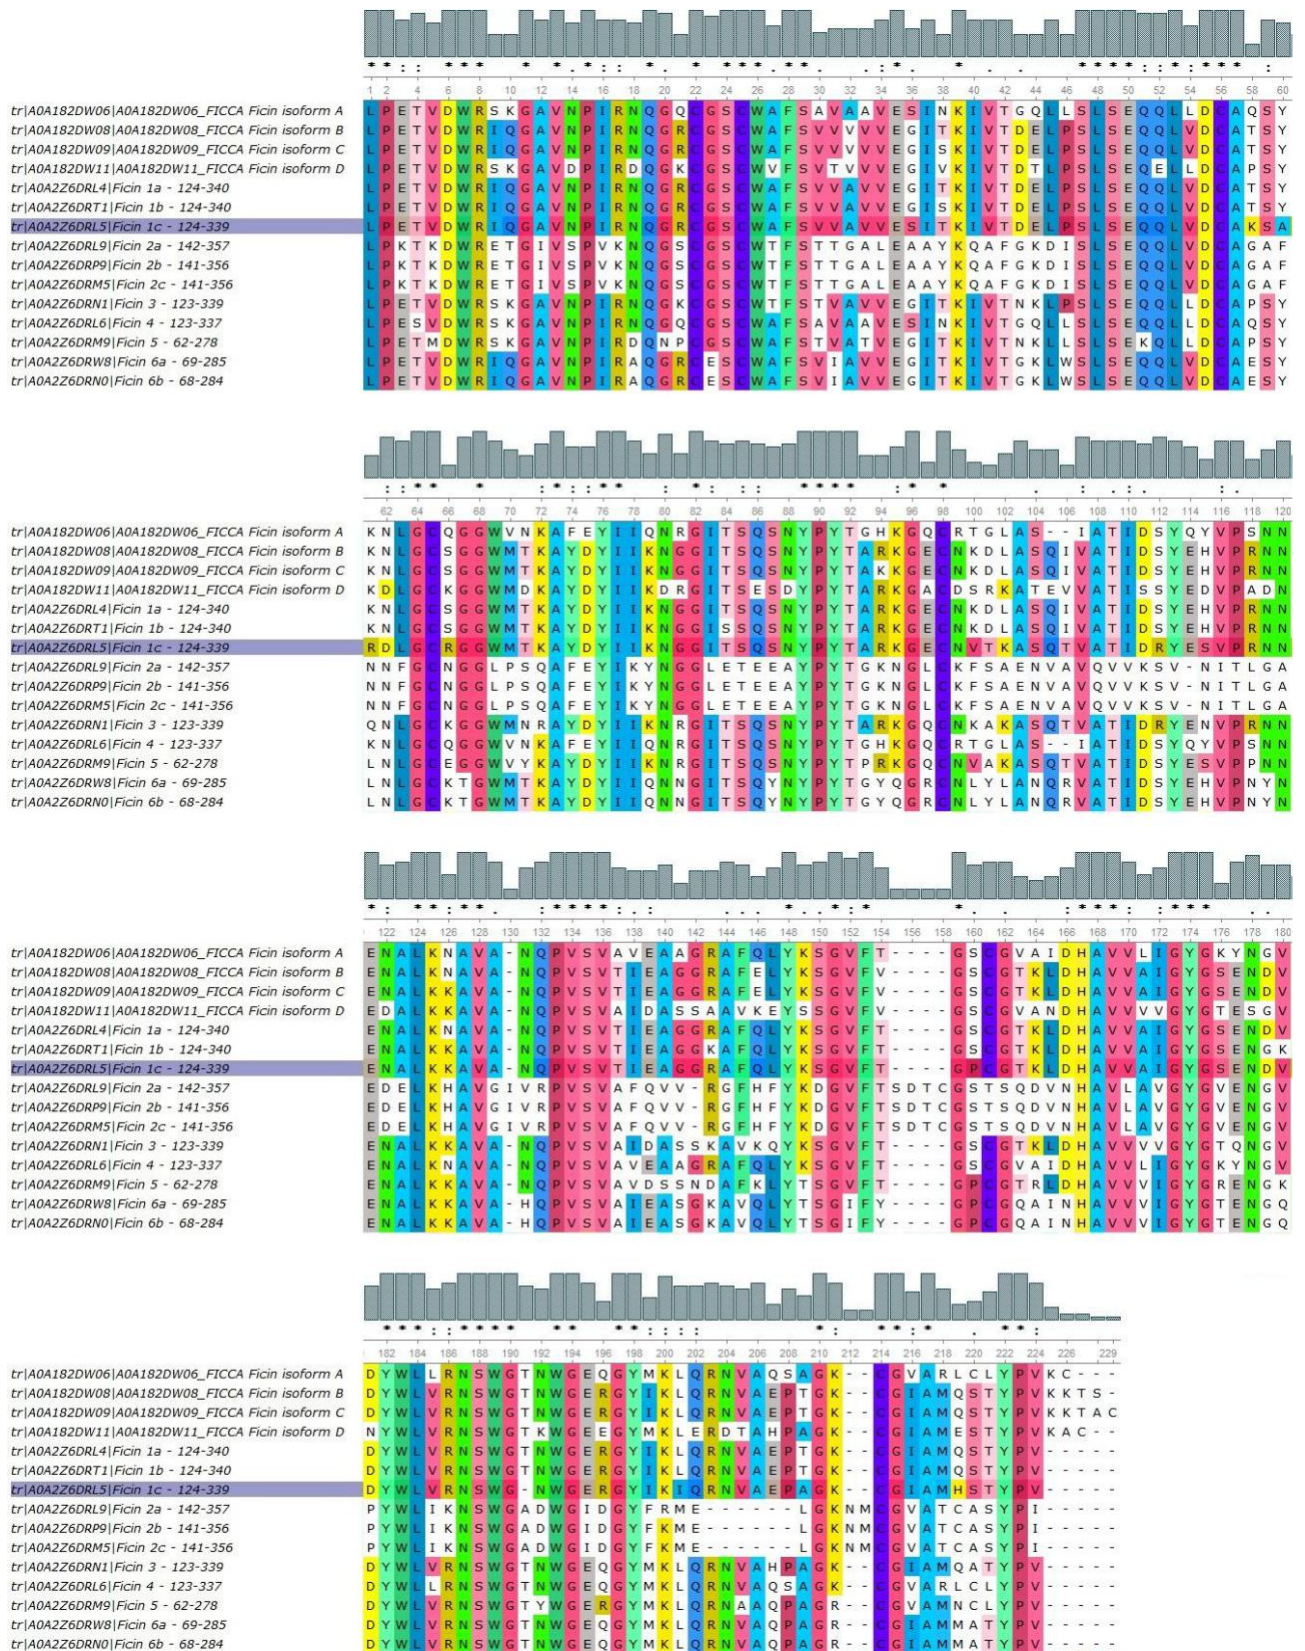



Supplementary figure S3. Deconvoluted Amide I region of Ficin 1c FTIR spectrum.

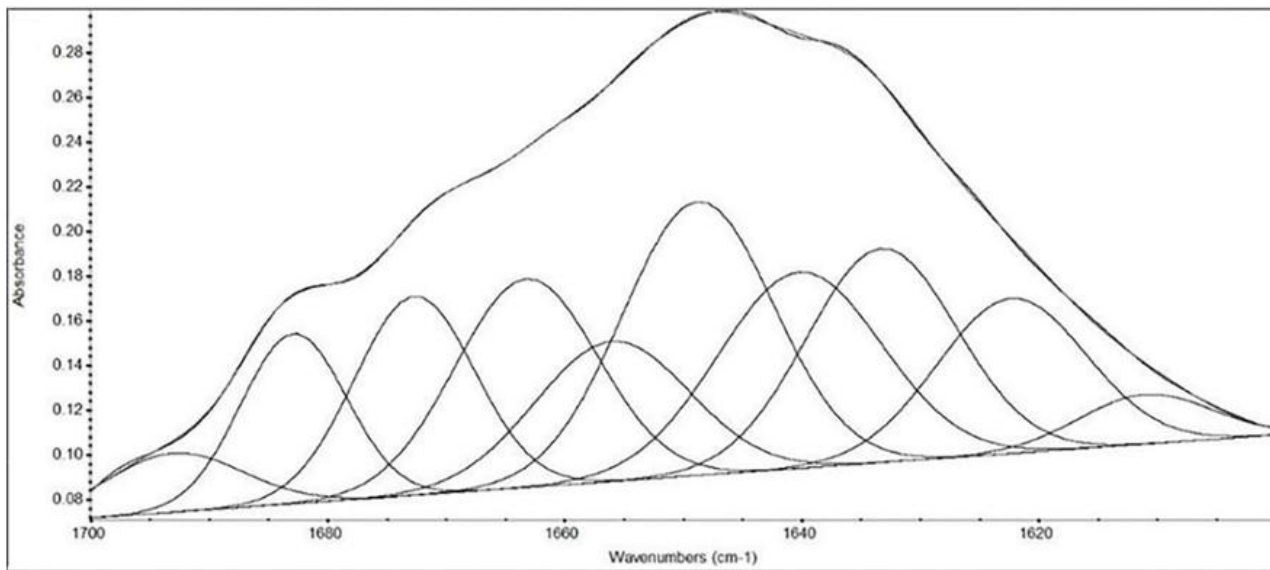

Supplement: d0nj02938f1.pdf [file d0nj02938f1.pdf]
